# Supplementary material for: Anthrax outbreak investigation in Kanungu District, Uganda, June–November 2024
Source: Research Square preprint supplement (doi:10.21203/rs.3.rs-6854973/v1), 2025-07-18
Supplement: Supplementary file 1 [file 86067c7e89e4d7a248a4b649.docx]

**Case Investigation Form- Human Cases**

**Anthrax Outbreak Investigation – Kanungu September 2024**

**Hello, my name is __________________________ and I am an Epidemiologist from the Ministry of Health. A. Since September, 2024, there are reports of people and animals dying suddenly from Kanungu. We are visiting homes and farms in this district to search for people who became ill or died. We want to try to find out how and why they became sick. We are only here to understand more how this can be prevented in the future. We will not share your name or information outside the team here. Your answers will be kept confidential within our study team. In case we ask you questions that you don’t want to answer, you can say so. There is no direct benefit to you to answering these questions, but your honest answers may help us keep people in your village healthy in the future. Do you agree to participate?**

**Yes……………… No………….**

**Interviewers Name: …………………………………………. Date: …………………..**

1. **Patient Identification**

| 1 | GPS Coordinate of household | **€** Not interviewed at home | Latitude: Longitude: | | | |
| --- | --- | --- | --- | --- | --- | --- |
| 2 | Case ID No. (Interviewer initials + serial number e.g DD001) | |  | | | |
| 3 | Date of interview (dd/mm/yyyy) | |  | | | |
| 4 | Name of interviewee | |  | | | |
| 5 | Relationship of interviewee to case / control | | Self  Friend  Relative, specify: ___________________ | | | |
| X | Name of case/control (if different from above) | |  | | | |
| 6 | Age (Completed years) of case / control | |  | | | |
| 7 | Sex of case / control | | Male, Female | | | |
| 8 | Occupation (select all that apply) of case / control | | Butcher  Cattle keeper  Meat trader  Slaughterer  Boda boda rider  Crop farmer  Shop owner  Others (Specify) ……………… | | | |
| 9 | Address of case / control | | Village | Parish | Sub-county | District |
| 10 | Telephone contact of case/proxy or control | |  | | | |
| 11 | Education level of case / control | | None, Primary, Secondary, Tertiary | | | |
| 12 | Religion of case / control | | Protestant, Catholic, Muslim, Pentecostal, Other…… | | | |
| 13 | How many people stay in the case’s / control’s HH? | |  | | | |

1. **Clinical Characteristics**

14. Symptoms: Have you experienced any of the following signs or symptoms from 1st /July/ 2024 to-date? **(Tick all that apply)**

| **General**  Fever [ ] Yes [ ] No  General body weakness [ ] Yes [ ] No  Lack of appetite [ ] Yes [ ] No  Fainting/ Collapsing [ ] Yes [ ] No  **Gastrointestinal**  Abdominal pain [ ] Yes [ ] No  Abdominal swelling [ ] Yes [ ] No  Vomiting [ ] Yes [ ] No  Non-bloody diarrhea [ ] Yes [ ] No  Bloody diarrhea [ ] Yes [ ] No  Neck swelling [ ] Yes [ ] No  Pain on swallowing [ ] Yes [ ] No  Lesions in the mouth [ ] Yes [ ] No | **Cutaneous**  Itching of skin [ ] Yes [ ] No  Reddening of the skin [ ] Yes [ ] No  Swelling of the skin [ ] Yes [ ] No  Vesicle/Papule on the skin [ ] Yes [ ] No  Wound with black center [ ] Yes [ ] No  Swollen lymph nodes [ ] Yes [ ] No  **Inhalation**  Cough [ ] Yes [ ] No  Chest pain…………………………[ ] Yes [ ] No  Difficulty in breathing [ ] Yes [ ] No  **Meningeal**  Headache [ ] Yes [ ] No  Neck pain/Stiffness [ ] Yes [ ] No  Photophobia [ ] Yes [ ] No |
| --- | --- |

15. Date of onset of first symptom: (dd/mm/yyyy)……………………………………….

16. Criteria met by the person: Case € Control€ 🡪Go to Q 25

**C. Treatment History**

17. Did you go seek care for this illness?

| Yes | No 🡪Go to Q 19 |
| --- | --- |

18. If yes, where? Health Facility [ ], Drug shop [ ], VHT [ ], Traditional healer Re[ ],Religious healer[ ] Others [ ], (Specify)…………………..

19. If no, what did you do? ...........................................................................................................

For those who visited Health Facility or Drug shop

| 20. Name of facility |  |
| --- | --- |
| 21. Date of Facility Visit **dd/mm/yyyy** |  |
| 22. Were you admitted? | Yes, No 🡪Go to Q 24 |
| 23. If yes, Date of admission **dd/mm/yyyy** |  |
| 24.Treatment given | Antibiotics [ ]  Painkillers [ ]  IV fluids [ ]  Surgical management/Debridement [ ]  Unknown[ ]  Others (Specify)………………………… |

1. **Animal ownership**

| 25. Do you have any of these animals where you live?  Cattle [ ] Yes(how many)……………[ ] No  Goats [ ] Yes (how many)………… [ ] No  Sheep [ ] Yes (how many)…………..[ ] No  None [ ] Yes |
| --- |

1. **Exposure Characteristics**

**The following questions pertain to the week before the onset of your symptoms. You said your symptoms began on [DATE X]. So I am asking about [DATE X – 7 days to DATE X]. For the following questions, please think about only that time period.**

During the period above:

| 26. Did you have any contact with dead livestock, wild animals or their body fluids? | Yes | | No |
| --- | --- | --- | --- |
| 27. If yes, **Date of contact (dd/mm/yyyy):** |  | | |
| 28. Did you participate in the slaughtering or handling of any animal products since the mentioned date? | Yes | | No 🡪Go to Q 37 |
| 29. If yes, (how many?) …………. |  | |  |
| 30.Which animals?  Cattle ………  Goats ………  Sheep……… |  | |  |
| 31. How did you participate? |  | |  |
| a) Carrying to slaughter site | Yes | | No |
| b) Slaughtering (cutting off the head) | Yes | | No |
| c)Skinning | Yes | | No |
| d)Supporting such as holding legs during skinning | Yes | | No |
| d)Dissecting | Yes | | No |
| e) Dressing (Removing internal organs) |  | |  |
| e) Cleaning up after the slaughter |  | |  |
| f) Carrying already dissected parts such as | Yes | | No |
| a)Meat | Yes | | No |
| b) Skin | Yes | | No |
| c) Others, specify………………… |  | | |
| 32. If yes, how did you carry it? |  | |  |
| a) Carried on the shoulder | Yes | | No |
| b) Carried in the arm | Yes | | No |
| c) Used a stick | Yes | | No |
| d) Others,  Specify………………………………….. | Yes | | No |
| 33. If yes, how many…………………… |  | |  |
| Which animals?  Cattle [ ]  Goats [ ]  Sheep [ ] |  | |  |
| 34. How did you participate? |  | |  |
| a) Carrying to slaughter site | Yes | | No |
| b) Slaughtering | Yes | | No |
| C)Skinning | Yes | | No |
| d)Supporting such as holding legs during skinning | Yes | | No |
| d)Dissecting + Dressing (Removing internal organs) | Yes | | No |
| e) Carrying already dissected parts such as | Yes | | No |
| 1)Meat | Yes | | No |
| 2) Skin | Yes | | No |
| 3) Others, specify…………………………………. |  | | |
| 35. If yes, how did you carry it? |  | |  |
| 1. Carried on the shoulder | Yes | | No |
| 1. Carried in the arm | Yes | | No |
| 1. Used a stick | Yes | | No |
| 1. Others, Specify……………………………. |  | |  |
| 36. How did you protect yourself when handling the meat? | Handwashing [ ]  Used gloves [ ]  Wore boots [ ]  Wore coveralls [ ]  None [ ]  Others (Specify)………………………… | | |
| 37. Did you consume meat from animals that had died suddenly 7 days prior to onset of symptoms? | Yes | No 🡪Go to Q 41 | |
| 38.If purchased, what was the lowest price of the meat? (Ug Shillings) |  | | |
| 39. If yes, in what form? Tick all that apply | 1. Fried |  |  |
| 2. Boiled |  |  |
| 3. Roasted |  |  |
| 4. Smoked  5. Other…….. |  |  |
| 40. Where was the meat from? | 1. Slaughter house, Name of owner……………. and village(dropdown)________________ 2. Butchery /Market, Name of owner……………. and village(dropdown)________________ 3. Neighbor /Relative /Friend; Name and village(dropdown)________________ 4. Dead meat dealer, Name ……………. and village(dropdown)________________ 5. Own; village……………………. 6. Other (Specify)……………………………….. | | |
| 41. Do you have hides in your home from animals slaughtered since June 2023? | Yes | | No **🡪** Go to Q 43 |
| 42.Are the hides from animals that died suddenly? | Yes | | No |

1. **Laboratory Testing** (skip section for controls)

| 43. Was Laboratory Testing done | Yes | No 🡪Go to Q 47 |
| --- | --- | --- |
| 44. Sample type taken (Tick all that apply) | Blood | Swabs | Tissue | Other (Specify)…………………… |
| 45. Type of test (Tick all that apply)- check report | PCR | Microscopy | ELISA | Other (Specify)…………………… |
| 46. Laboratory results- (check report) | Positive [ ],  Negative [ ],  Pending |

47. Are you aware of any persons with similar symptoms in this village or other?

| Yes | No 🡪 **End Interview** |
| --- | --- |

48. If yes, may you name them: …………………………..

Thank you for your time
